# Supplementary material for: Pore-coordination sphere facilitated ratiometric fluorescent detection of organic amines in a substitutional metal–organic matrix
Source: Royal Society of Chemistry journal article supplement (doi:10.1039/d4qm00523f), 2024-01-01
Supplement: d4qm00523f1.pdf [file d4qm00523f1.pdf]

## Supporting Information

### **Pore-coordination sphere facilitated ratiometric fluorescent detection of organic amines in a substitutional metal–organic matrix**

Kai Xing,<sup>\*a</sup> Xiao-Yuan Liu,<sup>\*b</sup> Cheng-Shan Ji,<sup>c</sup> and Jing Li<sup>\*db</sup>

<sup>a</sup> Department of Chemistry, College of Basic Medicine, Third Military Medical University (Army Medical University), Chongqing, 400038, P.R. China

<sup>b</sup> Hoffmann Institute of Advanced Materials, Shenzhen Polytechnic University, 7098 Liuxian Blvd, Nanshan District, Shenzhen, 518055, P.R. China

<sup>c</sup> MIIT Key Laboratory of Critical Materials Technology for New Energy Conversion and Storage, School of Chemistry and Chemical Engineering, Harbin Institute of Technology, Harbin, 150001, P. R. China

<sup>d</sup> Department of Chemistry and Chemical Biology, Rutgers University, 123 Bevier Road, Piscataway, New Jersey, 08854, United States

## Contents

|                                           |    |
|-------------------------------------------|----|
| Section 1. Materials and Methods .....    | 3  |
| Section 2. Structural Information.....    | 4  |
| Section 3. General Characterization ..... | 5  |
| Section 4. Fluorescent Measurements ..... | 8  |
| References .....                          | 20 |

## **Section 1. Materials and Methods**

### **Chemical stability**

10 mg finely ground HIAM-3001, HIAM-3002 and HIAM-3001-PNT-25% powders were immersed in 5 mL of deionized water for 72 h; then the MOF powders were centrifuged and used to measure the PXRD patterns.

### **Computational Methods**

The geometries of PBT and PNT without and with methylamine were performed with Gaussian09 program.<sup>1</sup> To the ground state, the density functional theory (DFT) were applied using range-separated CAM-B3LYP functional together with 6-31g+(d,p) basis set in the conductor-like polarizable continuum model (CPCM) after considering the solvent effects of water ( $\epsilon = 78.36$ ). Accordingly, the geometries of excited states were optimized using the time-dependent density functional theory (TDDFT) with CAM-B3LYP functional and 6-31g+(d,p) basis set.

## Section 2. Structural Information

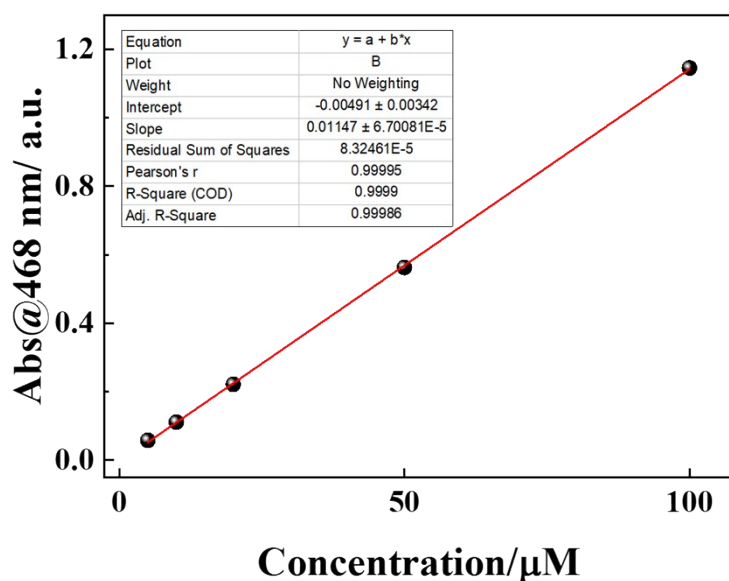

Fig. S1 Standard curve for quantification of PNT by UV-Vis spectra.

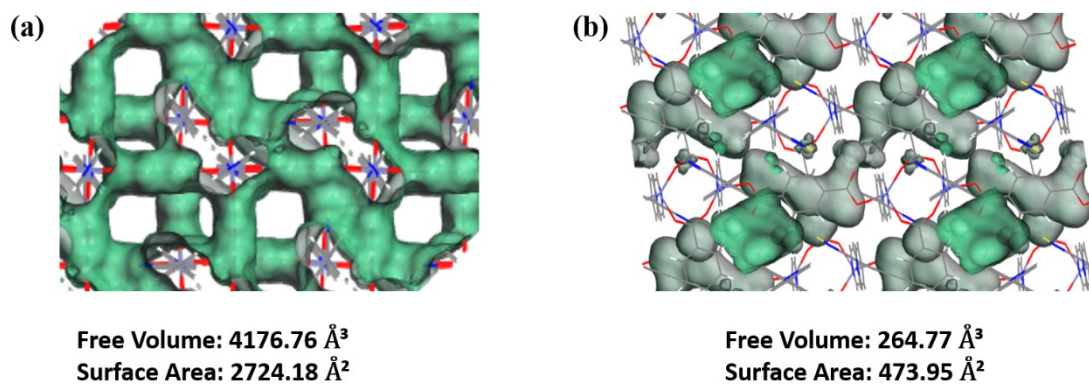

Fig. S2 (a) Solvent accessible void space of **HIAM-3001**; (b) Solvent accessible void space of **HIAM-3002** (gray: outer site of the pore and green: inner site of the pore).

### Section 3. General Characterization

#### Thermogravimetric Analysis

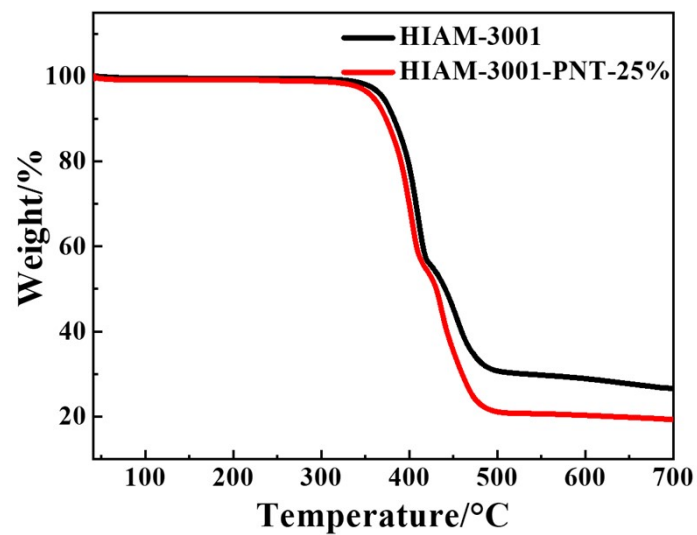

Fig. S3 TGA curves of HIAM-3001 and HIAM-3001-PNT-25%.

## Powder X-ray Diffraction Patterns

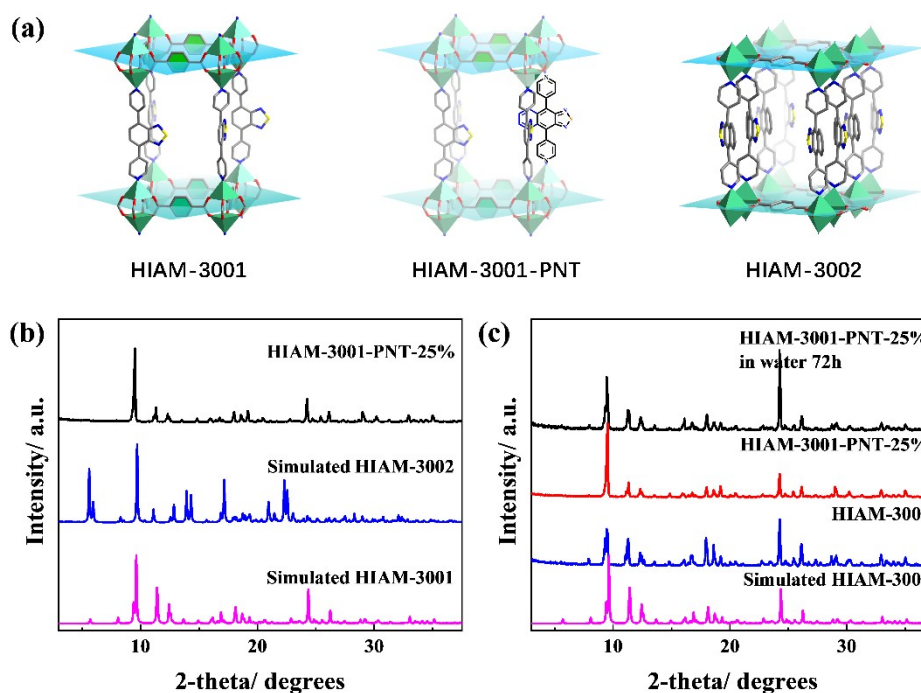

**Fig. S4** (a) Scheme of PNT ligand doping in pristine **HIAM-3001** matrix; (b) PXRD patterns of the as-synthesized **HIAM-3001-PNT-25%**, the simulated **HIAM-3001** and **HIAM-3002**; (c) PXRD patterns of the as-synthesized **HIAM-3001-PNT-25%** and **HIAM-3001-PNT-25%** after treatment in water for 72 h, in comparison with those of simulated and as-synthesized **HIAM-3001**.

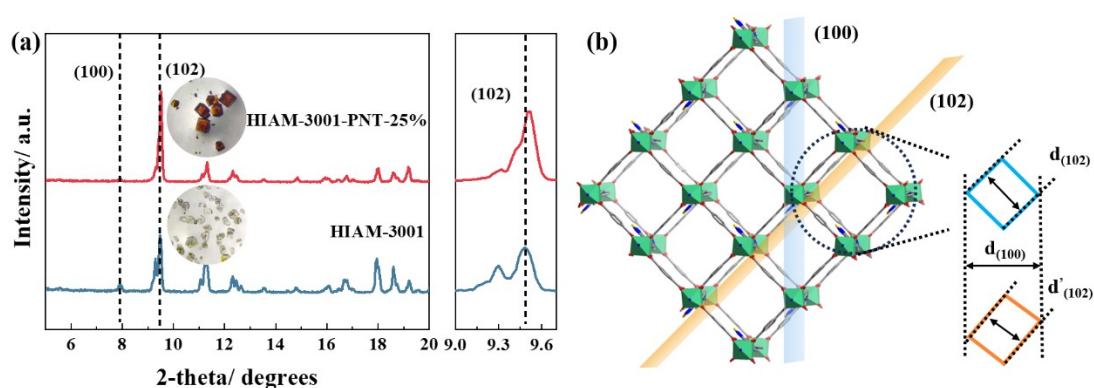

**Fig. S5** (a) PXRD profiles of **HIAM-3001** and **HIAM-3001-PNT-25%** (inset: crystal pictures); (b) schematic illustration of the framework change of **HIAM-3001** after ligand doping.

## Hirshfeld surfaces analysis

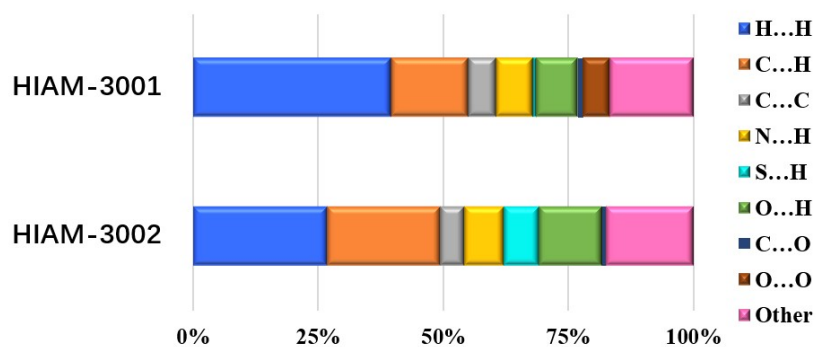

**Fig. S6** The bar chart of relative contributions for **HIAM-3001** and **HIAM-3002** to the Hirshfeld surface area for the various close intermolecular contacts.

## Section 4. Fluorescent Measurements

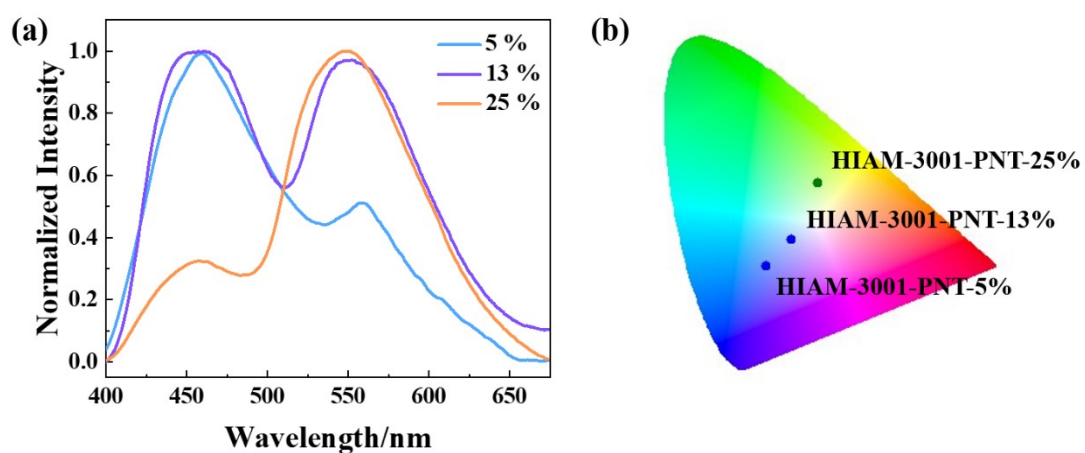

Fig. S7 Emission spectra of fluorescence mapping of **HIAM-3001-x%** with different ratios.

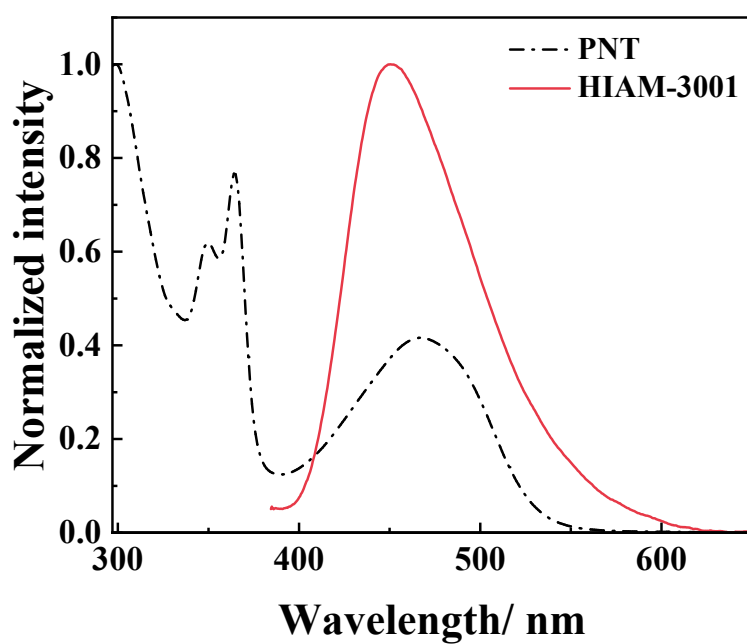

Fig. S8 Emission spectra of **HIAM-3001** (solid line) and UV absorbance of **PNT** (dashed dot line).



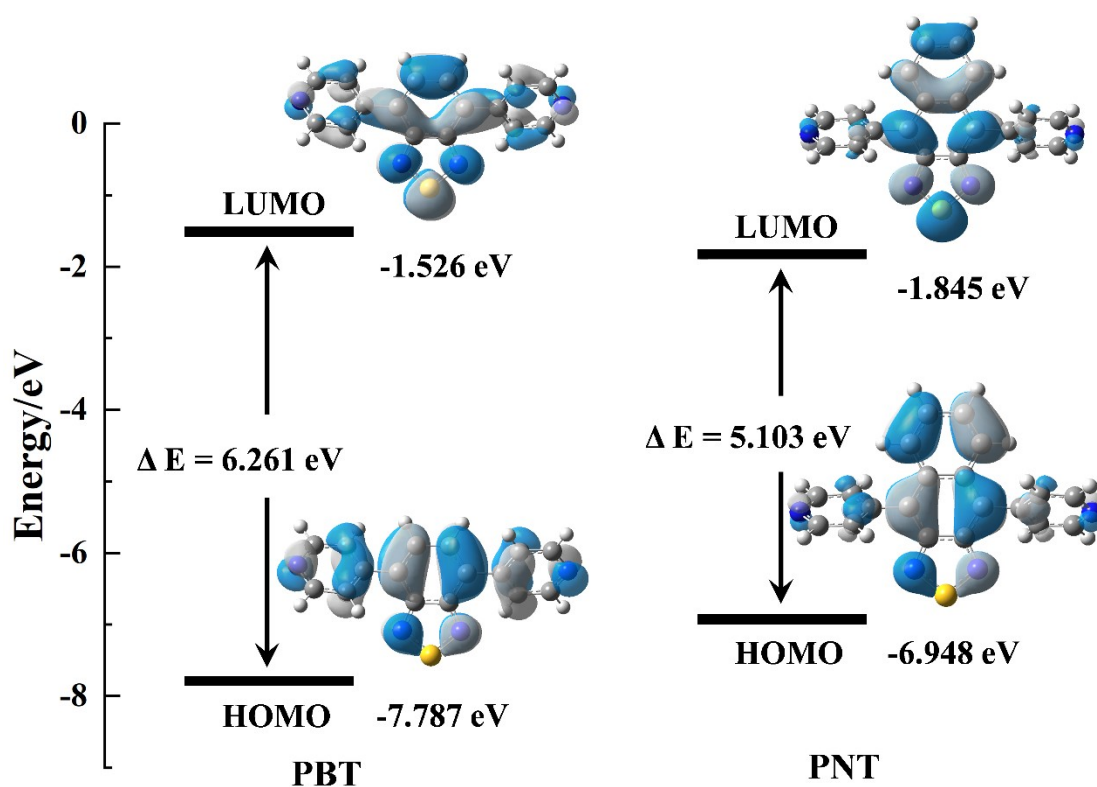

Fig. S9 Calculated HOMO and LUMO orbitals of **PBT** and **PNT** and their HOMO-LUMO energy gap, plotted with an isovalue of 0.04.

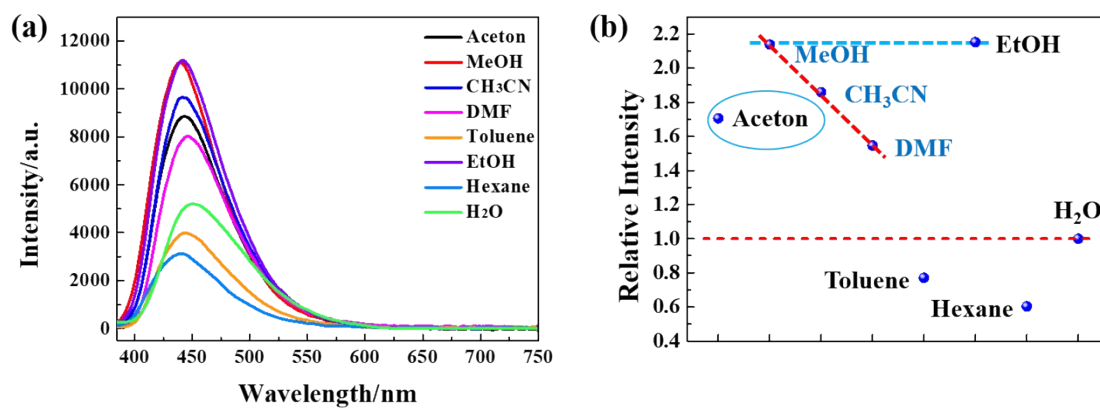

Fig. S10 (a) The emission, (b) relative intensity of **HIAM-3001** in different solvents.

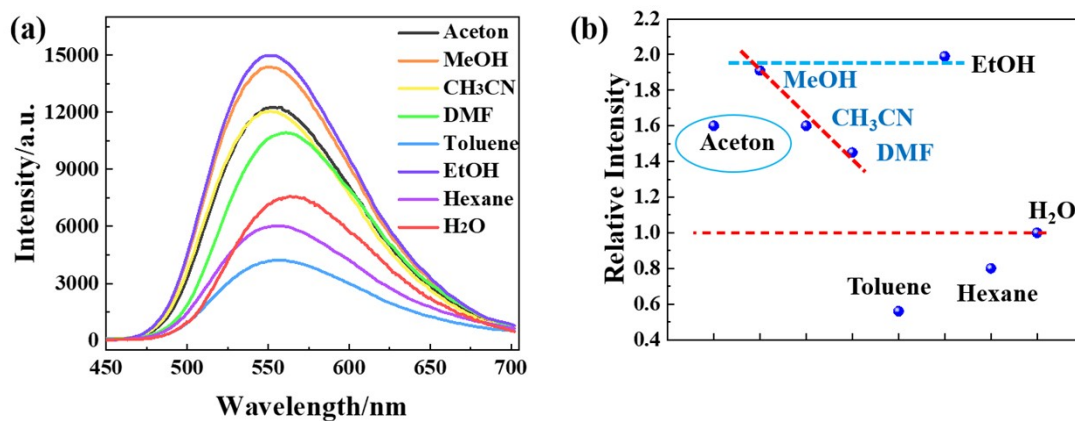

Fig. S11 (a) The emission, (b) relative intensity of **HIAM-3002** in different solvents.

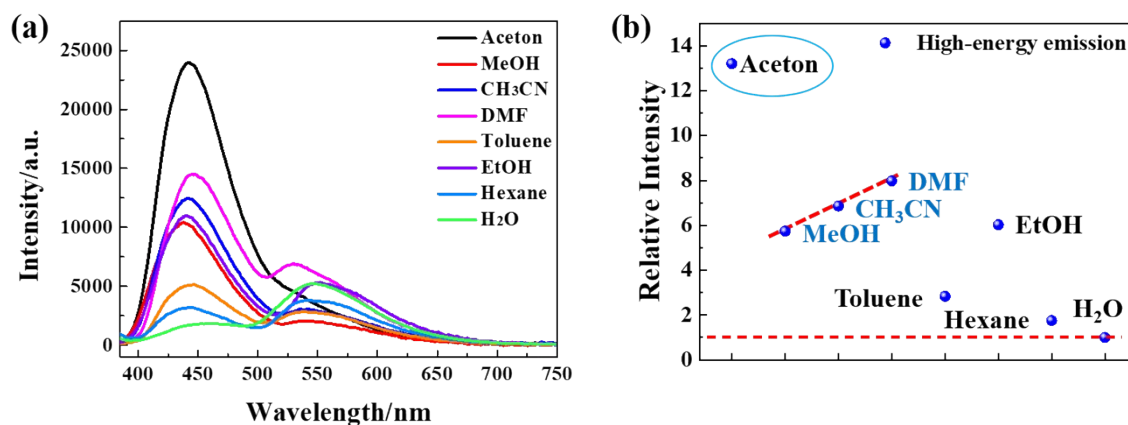

Fig. S12 (a) The emission, (b) relative intensity of **HIAM-3001-PNT-25%** in different solvents.

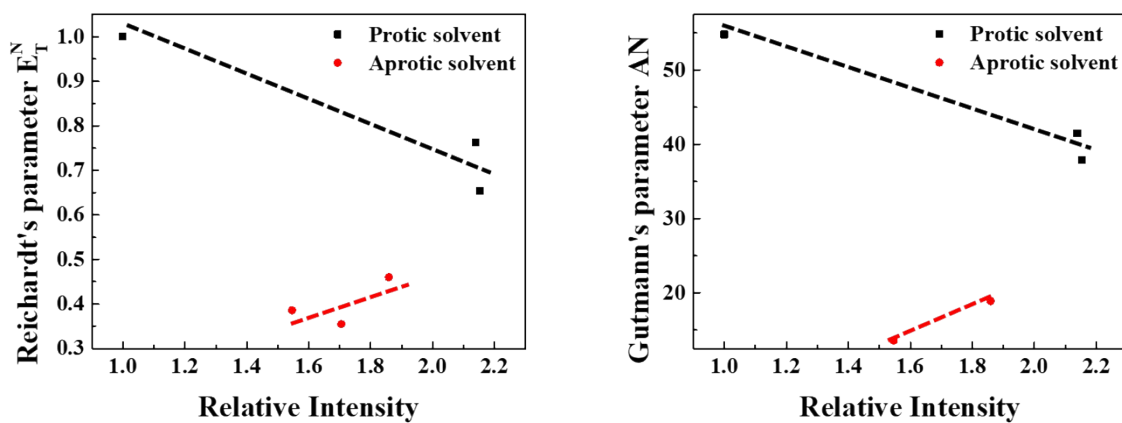

**Fig. S13** The relation between relative intensity and corresponding different solvent parameters for various solvents with different protic property for **HIAM-3001**.

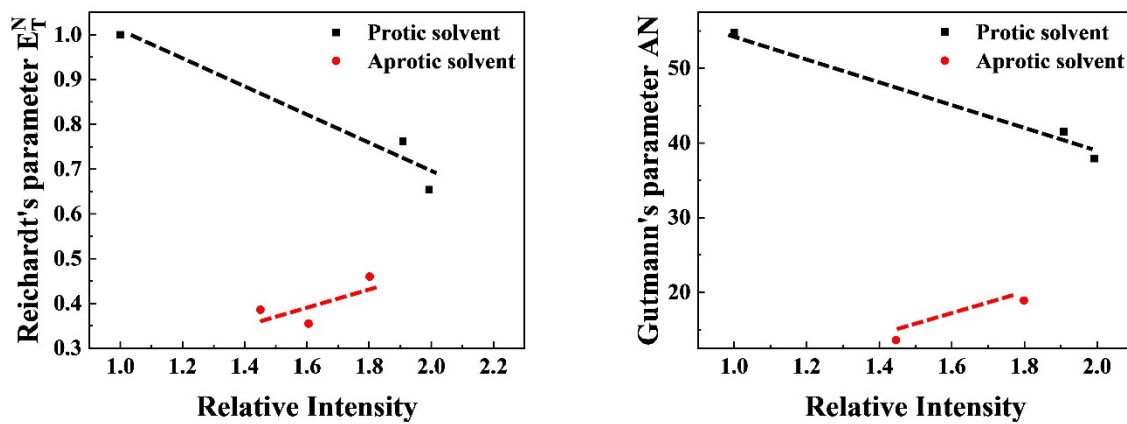

**Fig. S14** The relation between relative intensity and corresponding different solvent parameters for various solvents with different protic property for **HIAM-3002**.

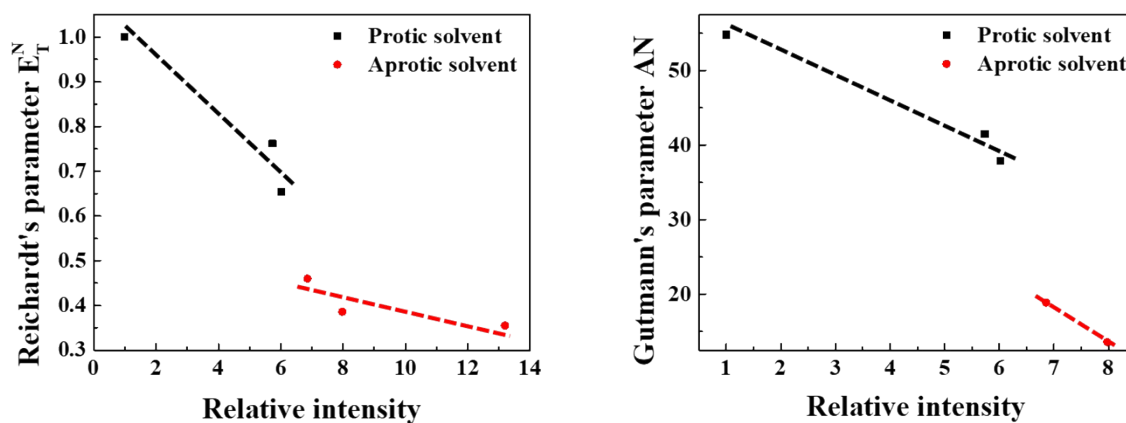

Fig. S15 The relation between relative intensity and corresponding different solvent parameters for various solvents with different protic property for **HIAM-3001-PNT-25%**.

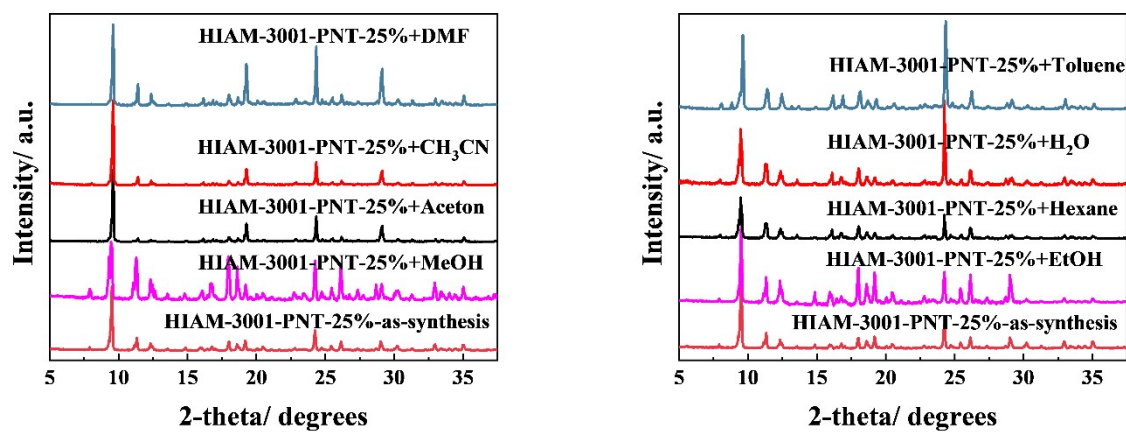

Fig. S16 The PXR D profiles of **HIAM-3001-PNT-25%** after immersing in different solvents for 72 h.

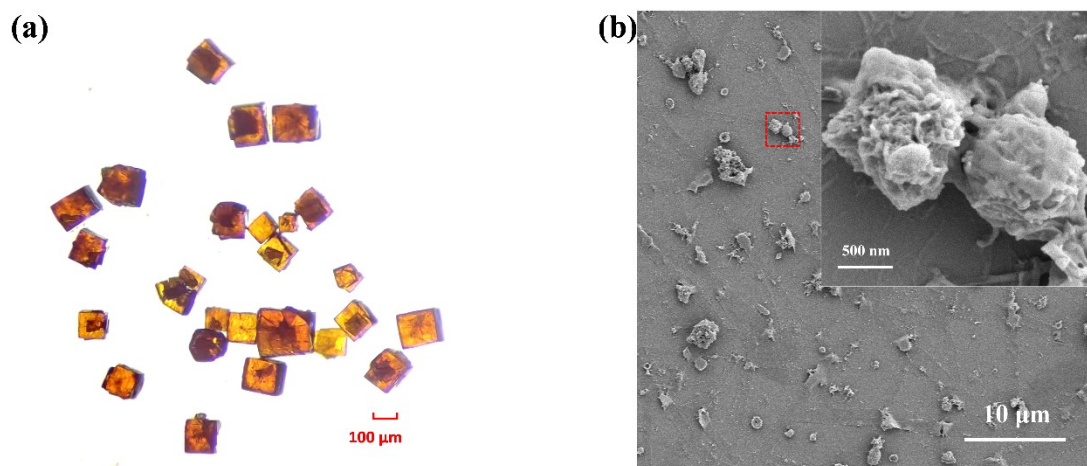

**Fig. S17** (a) Optical crystal photos of as-synthesized **HIAM-3001-PNT-25%**; (b) SEM image of **HIAM-3001-PNT-25%** after grinding.

**Table S1** Solvent dependent luminescence properties of **HIAM-3001**, **HIAM-3002** and **HIAM-3001-PNT-25%**.

| Solvent          | Solvent parameters     |                      | Luminescent property |                 |                    |                 |                    |                 |
|------------------|------------------------|----------------------|----------------------|-----------------|--------------------|-----------------|--------------------|-----------------|
|                  | Reichardt's parameters | Gutmann's parameters | HIAM-3001            |                 | HIAM-3002          |                 | HIAM-3001-PNT-25%  |                 |
|                  | $E_T^N$                | AN                   | Relative intensity   | CIE X/<br>CIE Y | Relative intensity | CIE X/<br>CIE Y | Relative intensity | CIE X/<br>CIE Y |
| Acetonitrile     | 0.460                  | 18.9                 | 1.86                 | (0.15,0.11)     | 1.80               | (0.41,0.54)     | 6.86               | (0.20,0.17)     |
| Acetone          | 0.355                  | -                    | 1.71                 | (0.15,0.10)     | 1.60               | (0.42,0.55)     | 13.19              | (0.18,0.14)     |
| MeOH             | 0.762                  | 41.5                 | 2.14                 | (0.15,0.09)     | 1.91               | (0.41,0.56)     | 5.73               | (0.20,0.15)     |
| EtOH             | 0.654                  | 37.9                 | 2.15                 | (0.15,0.10)     | 1.99               | (0.41,0.55)     | 6.02               | (0.26,0.24)     |
| DMF              | 0.386                  | 13.6                 | 1.55                 | (0.16,0.12)     | 1.45               | (0.44,0.54)     | 7.98               | (0.22,0.24)     |
| H <sub>2</sub> O | 1                      | 54.8                 | 1.0                  | (0.16,0.15)     | 1.0                | (0.46,0.53)     | 1.0                | (0.34,0.45)     |
| Toluene          |                        |                      | 0.77                 | (0.15,0.11)     | 0.56               | (0.43,0.54)     | 2.83               | (0.25,0.26)     |
| <i>n</i> -Hexane |                        |                      | 0.60                 | (0.16,0.10)     | 0.80               | (0.43,0.55)     | 1.75               | (0.30,0.36)     |

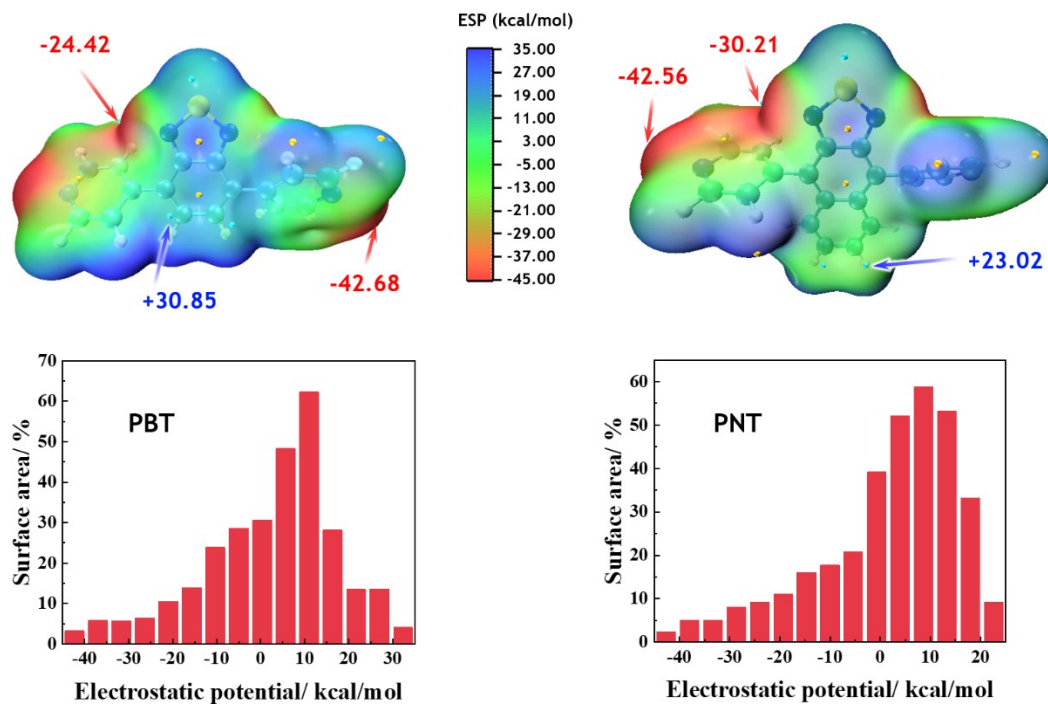

**Fig. S18** ESP-mapped molecular *vdW* surface and Electrostatic potential distribution of PBT (left) and PNT (right). (Significant surface local minima and maxima of ESP are represented as orange and azure spheres, respectively).

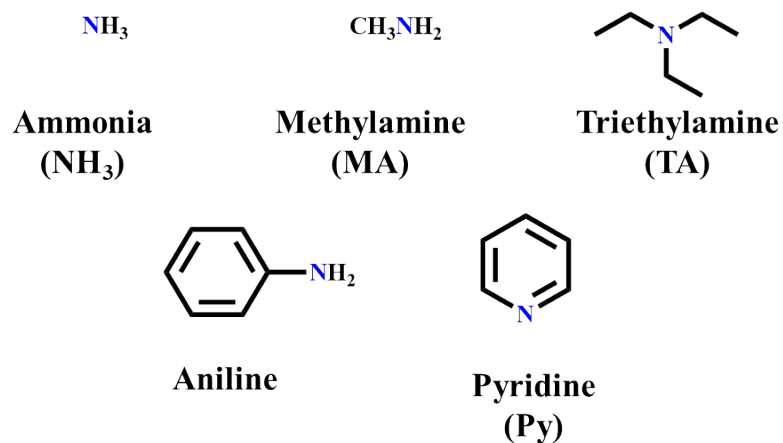

**Scheme S1** Structures of the selected organic amine analytes.

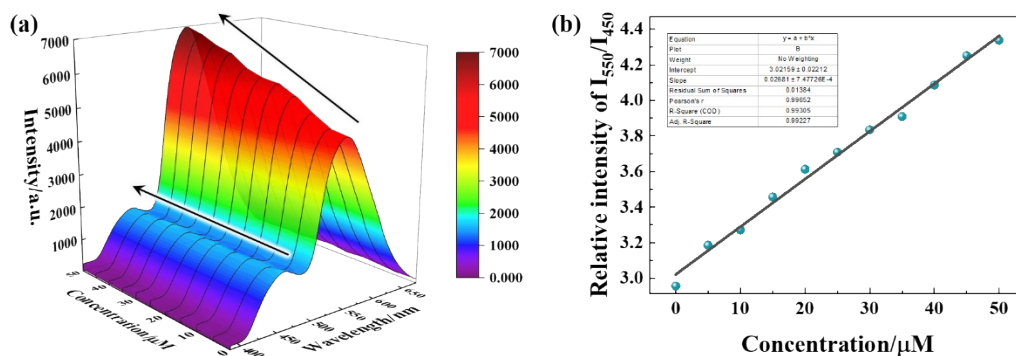

**Fig. S19** (a) Effect on the fluorescence of **HIAM-3001-PNT-25%** dispersed in water upon the incremental addition of ammonia solution; (b) linear fit for the estimation of detection limit.

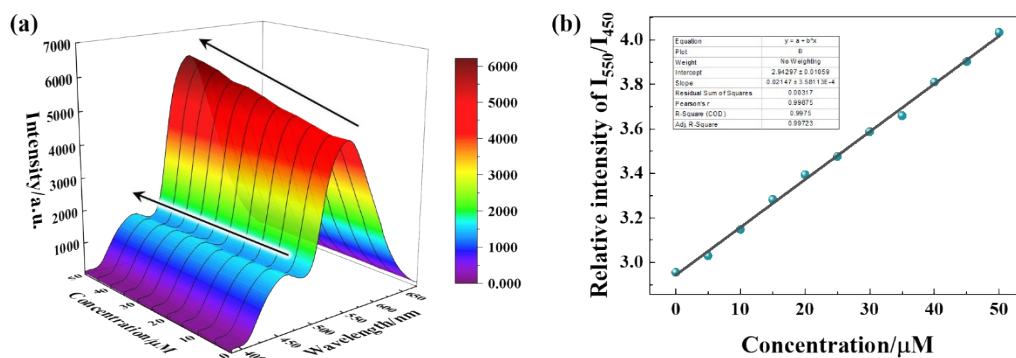

**Fig. S20** (a) Effect on the fluorescent spectra of **HIAM-3001-PNT-25%** dispersed in water upon the incremental addition of methylamine; (b) linear fit for the estimation of detection limit.



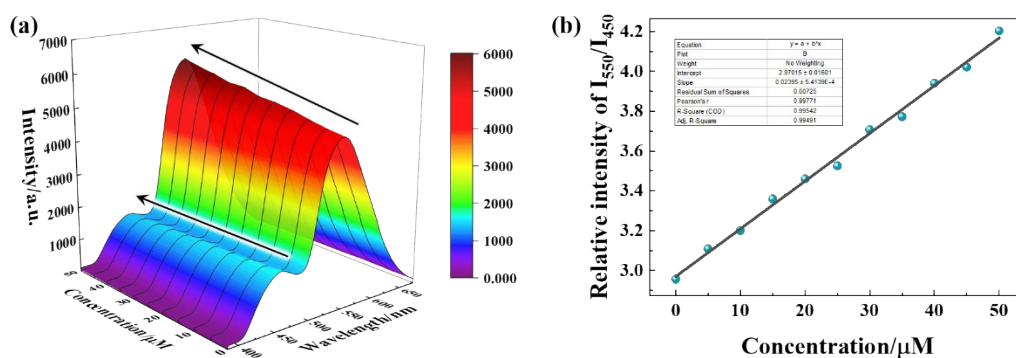

**Fig. S21** (a) Effect on the fluorescence of **HIAM-3001-PNT-25%** dispersed in water upon the incremental addition of triethylamine; (b) linear fit for the estimation of detection limit.

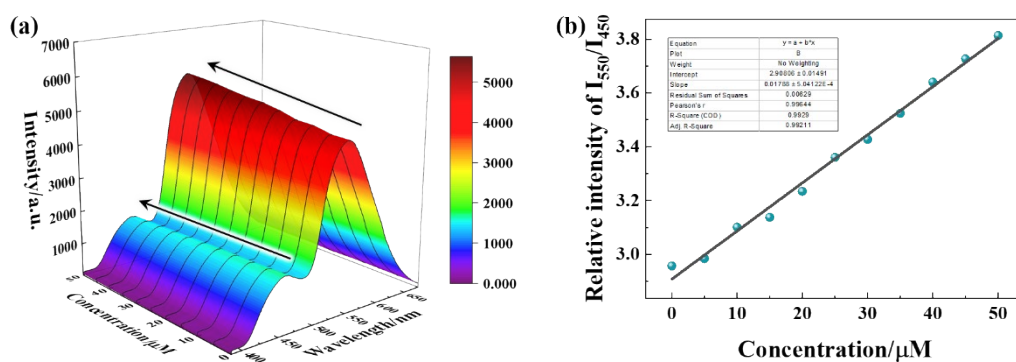

**Fig. S22** (a) Effect on the fluorescence of **HIAM-3001-PNT-25%** dispersed in water upon the incremental addition of cadaverine; (b) linear fit for the estimation of detection limit.

**Table S2** The limit of detection of selected analytes.

| Analytes                   | The limit of detection (LOD) |
|----------------------------|------------------------------|
| Ammonia (NH <sub>3</sub> ) | 0.299 ppm                    |
| Methylamine (MA)           | 0.681 ppm                    |
| Triethylamine (TA)         | 1.990 ppm                    |
| Cadaverine (PDA)           | 2.691 ppm                    |

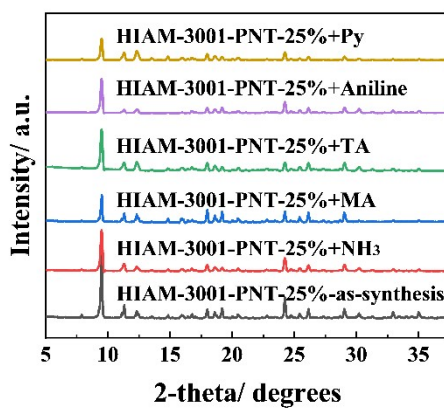

**Fig. S23** PXR D profiles of **HIAM-3001-PNT-25%** before and after fluorescent sensing.

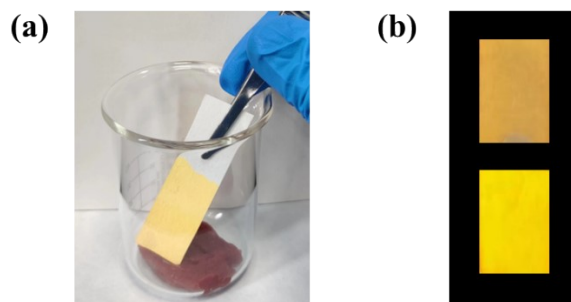

**Fig. S24** (a) Optical image of **HIAM-3001-PNT-25%** coated filter paper strip in the presence of spoiled beef at room temperature; (b) images of **HIAM-3001-PNT-25%** coated filter paper before (top) and after (bottom) presenting in the spoiled beef.

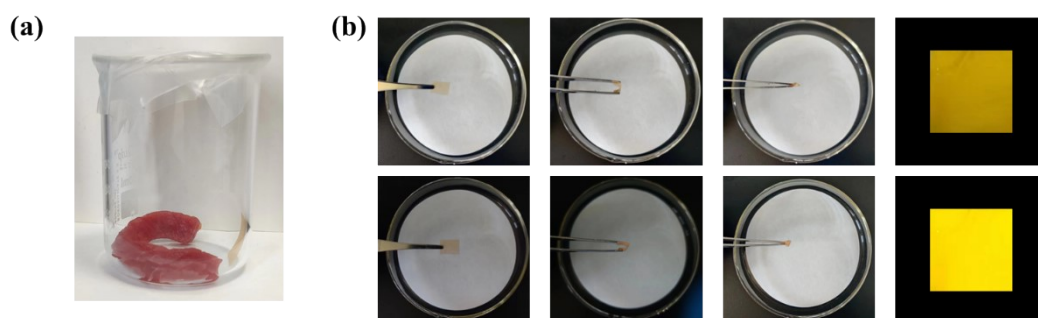

**Fig. S25** (a) Membrane exposure to the vapours from spoiled beef; (b) flexible membranes of **HIAM-3001-PNT-25%** before (top) and after (bottom) exposure to the vapours from spoiled beef.

## References

- 1 M. J. Frisch and e. al., *Gaussian 09, rev. D.01; Gaussian Inc.: Wallingford, CT, 2013.*
